# Supplementary material for: ASNEO: Identification of personalized alternative splicing based neoantigens with RNA-seq
Source: publisher site journal article supplement (doi:10.18632/aging.103516), 2020-07-22
Supplement: Supplementary file [file aging-v12i14-103516-supplementary-material-SD1.pdf]

## SUPPLEMENTARY FIGURE

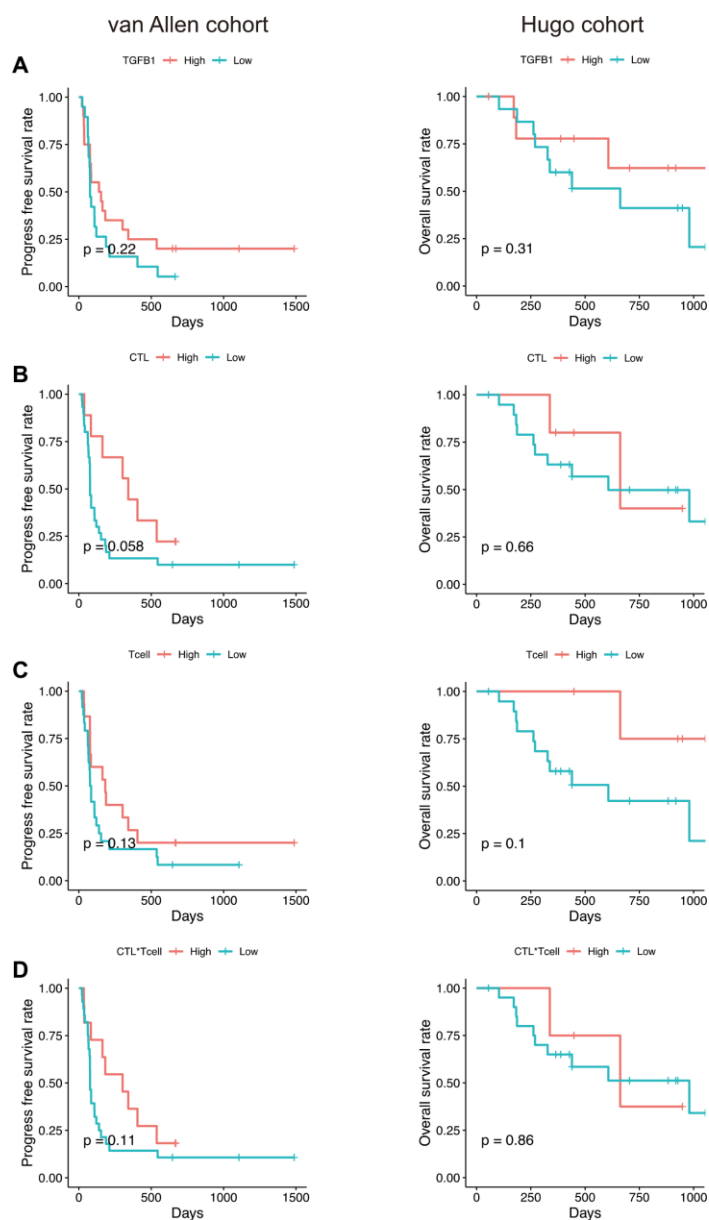

**Supplementary Figure 1. Survival analysis with different metrics.** (A) The TGFBI abundance could not separate patients in both cohorts. (B) The CTL abundance could not separate patients in both cohorts. (C) The T cell abundance could not separate patients in both cohorts. (D) The CTL\*Tcell abundance could not separate patients in both cohorts.
